# Supplementary material for: Increases in vein length compensate for leaf area lost to lobing in grapevine
Source: PubMed Central journal article supplement — Am J Bot. 2022 Jul 19;109(7):1063–73. doi: 10.1002/ajb2.16033 (PMC9545854; doi:10.1002/ajb2.16033), 2022-07-19

**Appendix S5. Correlation between the total major vein length (cm) and total branching vein length (cm).** Total major vein length (cm) was calculated by combining the length of the proximal, distal, and midvein. Total branching vein length (cm) was calculated by combining the length of the branching veins shown in Figure 1A, which does not include the proximal, distal, or midvein but does include the petiolar vein. Each leaf ( $n = 2632$ ) is shown, with the color of the point indicating the distal lobing value in both panels. The  $r$  and  $P$ -value for Pearson's correlation are indicated.

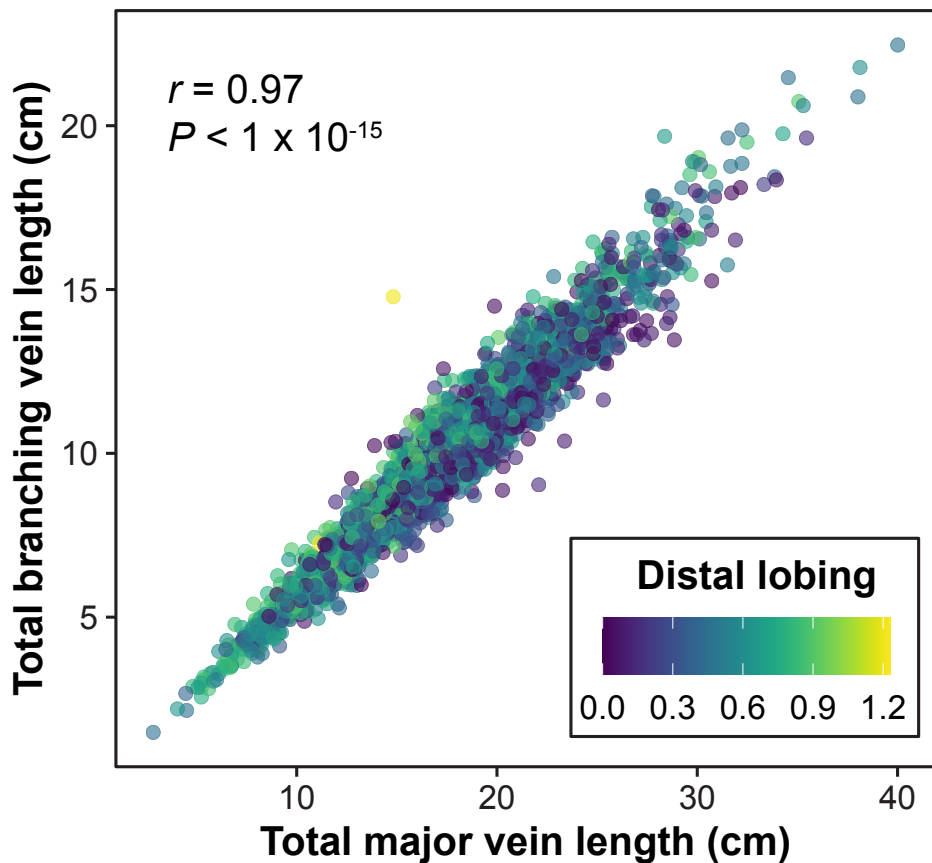

Supplement: AJB2-109-1063-s001.pdf [file AJB2-109-1063-s001.pdf]
