# Supplementary material for: Increases in vein length compensate for leaf area lost to lobing in grapevine
Source: PubMed Central journal article supplement — Am J Bot. 2022 Jul 19;109(7):1063–73. doi: 10.1002/ajb2.16033 (PMC9545854; doi:10.1002/ajb2.16033), 2022-07-19

**Appendix S4. Density plots indicating the distribution of distal lobing values for each of the five populations examined in this study.** Distal lobing values are calculated as the ratio of the length of the distal sinus to the length of the distal lobe, with values increasing as lobing decreases.

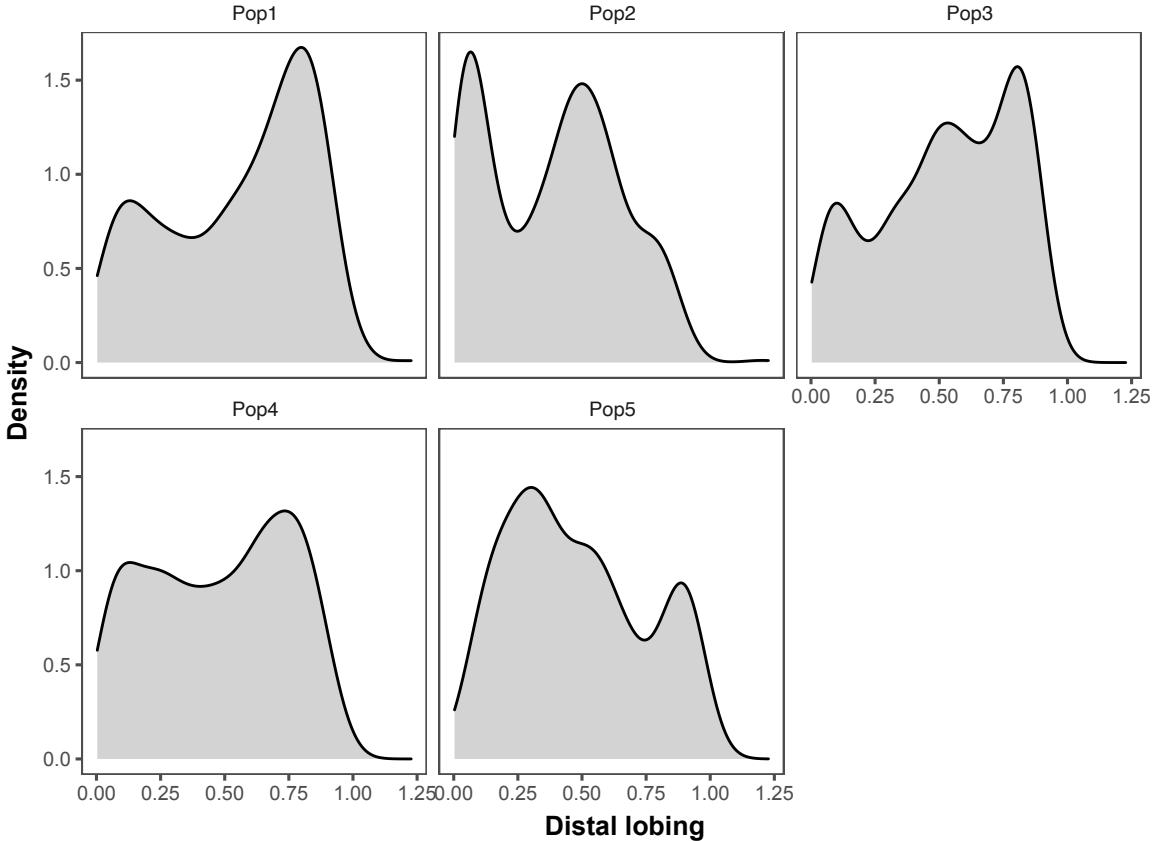

Supplement: AJB2-109-1063-s002.pdf [file AJB2-109-1063-s002.pdf]
