# Supplementary material for: Increases in vein length compensate for leaf area lost to lobing in grapevine
Source: PubMed Central journal article supplement — Am J Bot. 2022 Jul 19;109(7):1063–73. doi: 10.1002/ajb2.16033 (PMC9545854; doi:10.1002/ajb2.16033), 2022-07-19

**Appendix S3. (A) PC1 values for all leaves sampled in 2018 and 2019. (B) Distal lobing values for all leaves sampled in 2018 and 2019. (C) Total major vein length for all leaves sampled in 2018 and 2019. (D) Total branching vein length for all leaves sampled in 2018 and 2019.** A Mann–Whitney  $U$ -test was used to compare values across years;  $P$ -values are reported in the figure. Significant differences are also indicated with an asterisk. For PC1 and distal lobing, 2018 and 2019 leaves were not significantly different. For total major vein length (calculated as the sum of the length of the proximal, distal, and midvein) and total branching length (calculated as the sum of the petiolar vein and the remaining two branching vein shown in Figure 1A), leaves from 2019 had significantly longer veins than leaves from 2018.

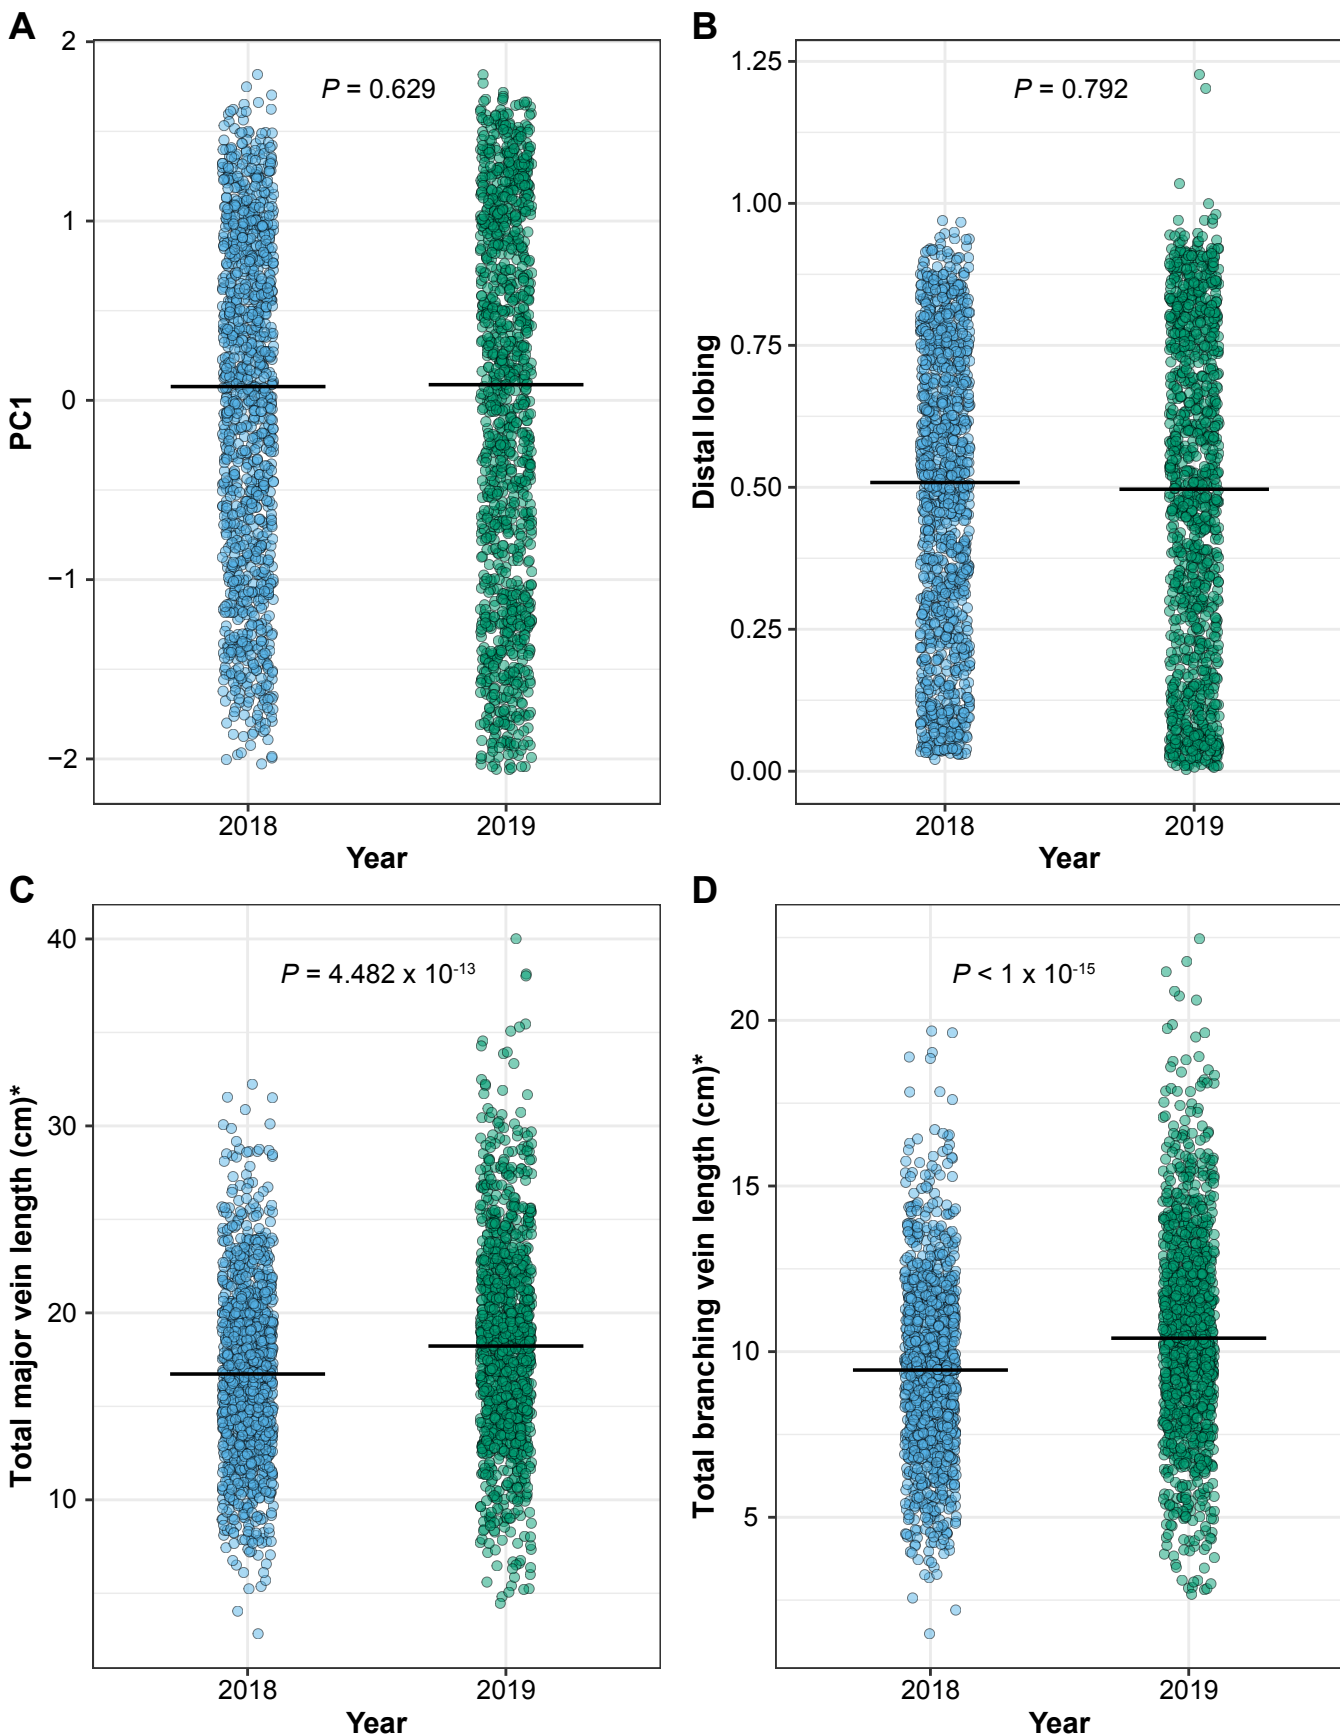

Supplement: AJB2-109-1063-s003.pdf [file AJB2-109-1063-s003.pdf]
