# Supplementary material for: Increases in vein length compensate for leaf area lost to lobing in grapevine
Source: PubMed Central journal article supplement — Am J Bot. 2022 Jul 19;109(7):1063–73. doi: 10.1002/ajb2.16033 (PMC9545854; doi:10.1002/ajb2.16033), 2022-07-19

**Appendix S1. (A) Leaf area (cm<sup>2</sup>) for all leaves sampled in 2018 and 2019. The area values are shown for the whole leaf and for the blade and vein portions of the leaves separately. Because values are small for vein area, that section of the plot is enlarged below. (B) The ratio between vein area and blade area for each leaf is shown for 2018 and 2019. Only leaves from vines sampled in both years (vine  $n = 398$ , leaf  $n = 2388$ ) are shown. The black vertical/horizontal lines indicate the medians. A Mann–Whitney  $U$ -test was used to compare values across years;  $P$ -values are shown. Significant differences are indicated with an asterisk. For the area of whole leaf, blade, and veins, 2019 leaves were significantly larger than 2018 leaves, but vein to blade ratio did not significantly differ between years.**

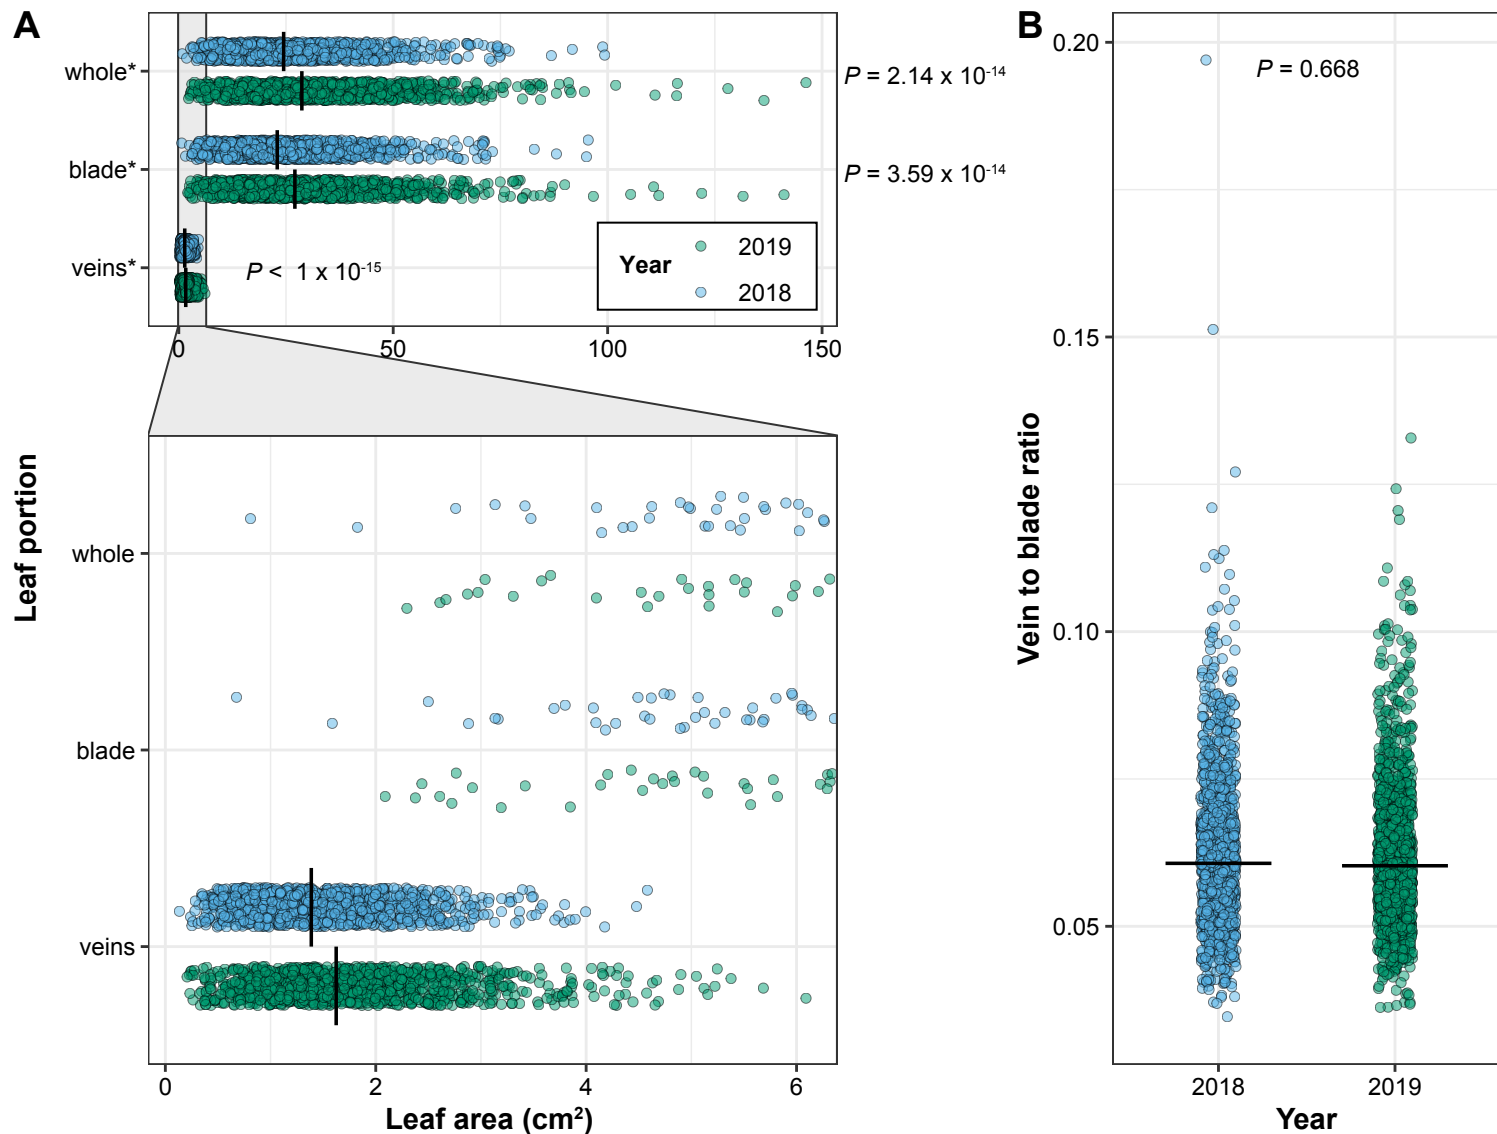

Supplement: AJB2-109-1063-s005.pdf [file AJB2-109-1063-s005.pdf]
