# Supplementary material for: Increases in vein length compensate for leaf area lost to lobing in grapevine
Source: PubMed Central journal article supplement — Am J Bot. 2022 Jul 19;109(7):1063–73. doi: 10.1002/ajb2.16033 (PMC9545854; doi:10.1002/ajb2.16033), 2022-07-19

**Appendix S6. (A) Natural logarithm of area ( $\text{cm}^2$ ) vs natural logarithm of total branching vein length. Total branching vein length (cm) was calculated by combining the length of the branching veins shown in Figure 1A, which does not include the proximal, distal, or midvein but does include the petiolar vein. (B) Distal lobing vs residuals from the model of natural logarithm of area ( $\text{cm}^2$ ) vs natural logarithm of total branching vein length, as indicated in panel A. In both panels, each leaf ( $n = 2632$ ) is plotted with the color of the point indicating the distal lobing value. The natural logarithm of leaf area varies significantly as a function of the natural logarithm of total branching vein length, and distal lobing varies significantly as a function of the residuals from that model. The adjusted  $R^2$  for each model is indicated on the plots.**

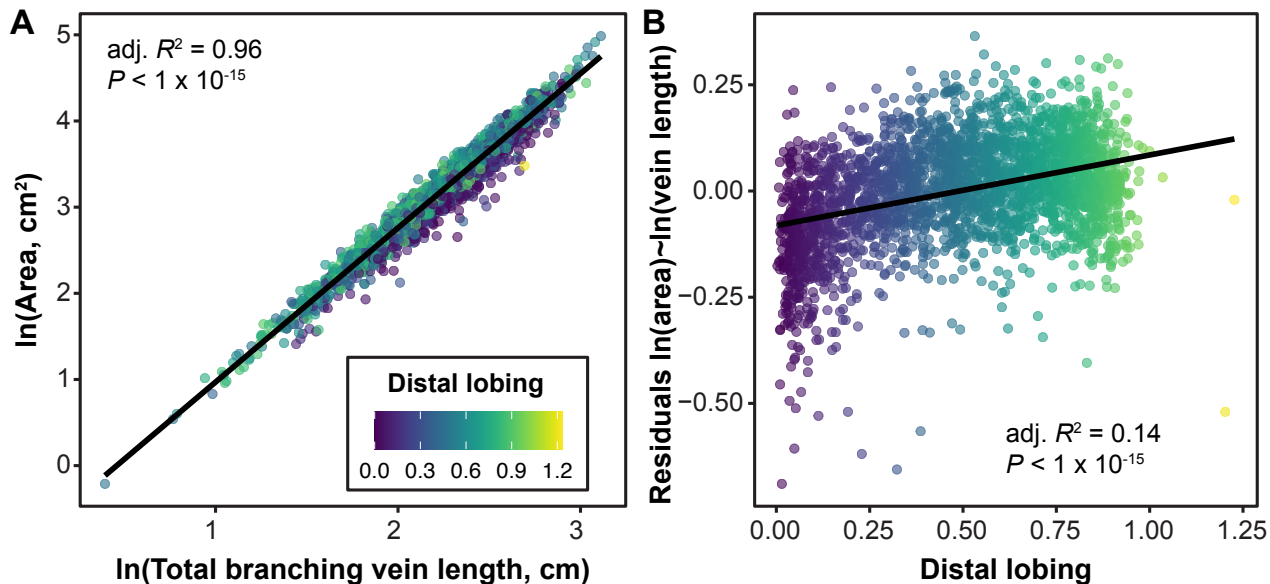

Supplement: AJB2-109-1063-s006.pdf [file AJB2-109-1063-s006.pdf]
